# Supplementary material for: Child outcomes after amnioinfusion compared with no intervention in women with second‐trimester rupture of membranes: a long‐term follow‐up study of the PROMEXIL‐III trial
Source: PubMed Central journal article supplement — BJOG. 2020 Mar 4;128(2):292–301. doi: 10.1111/1471-0528.16115 (PMC7818451; doi:10.1111/1471-0528.16115), 2020-03-04
Supplement: BJO-128-292-s001.pdf [file BJO-128-292-s001.pdf]

**CONSORT 2010 Flow Diagram**

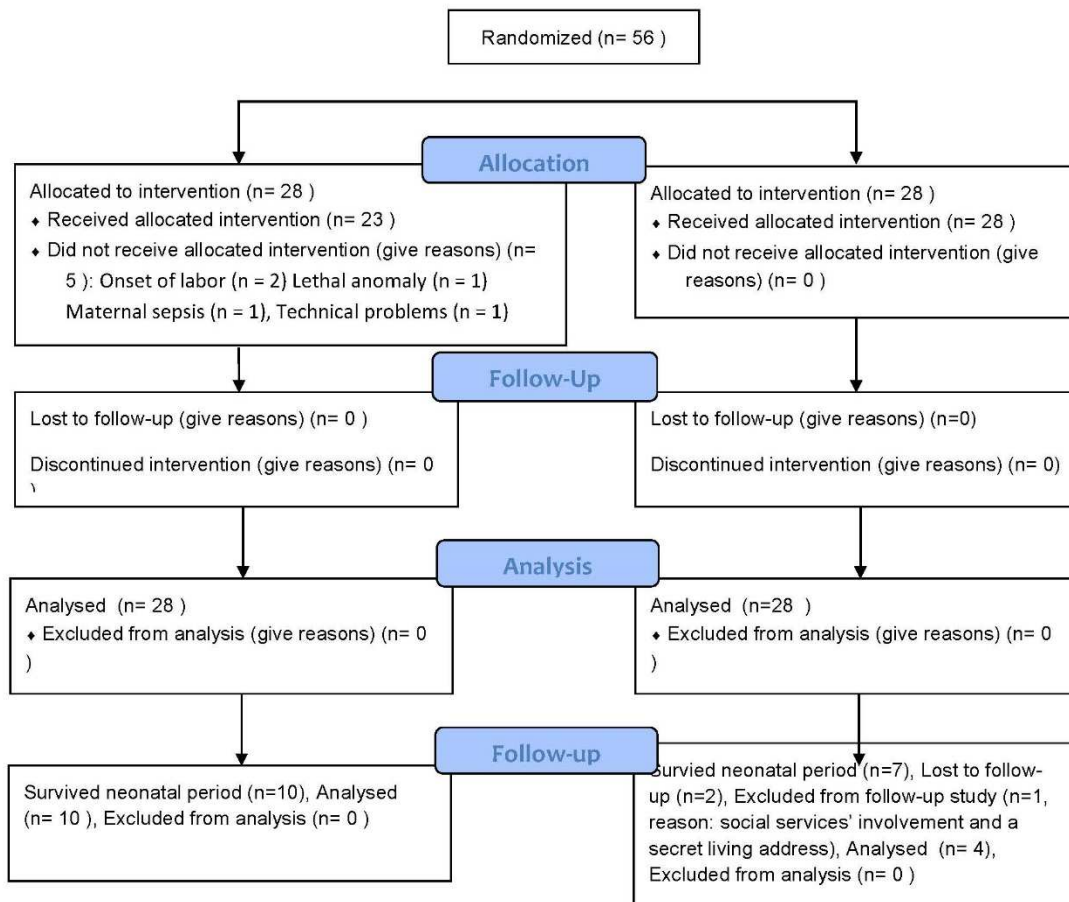

**Figure S1.** CONSORT flow diagram.

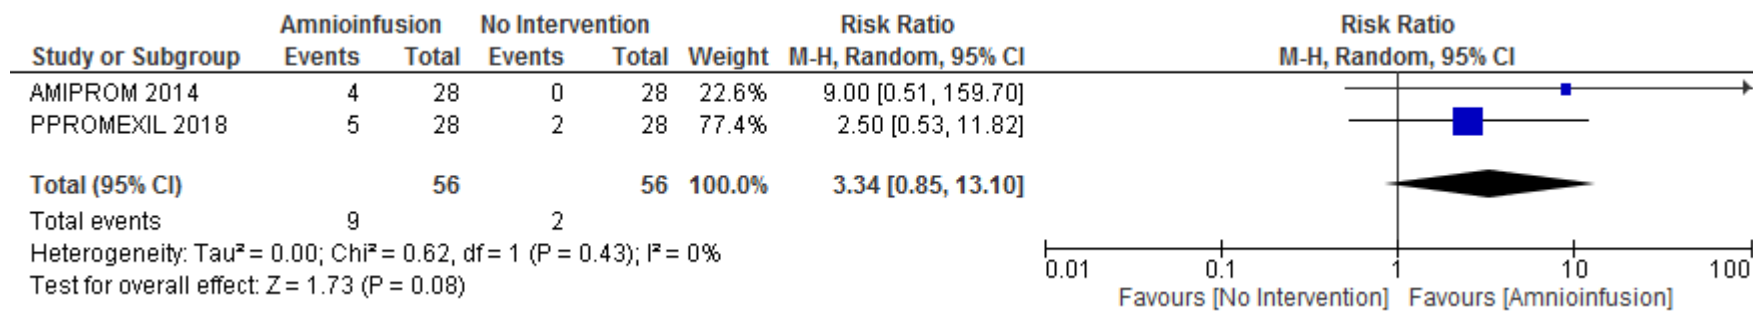

**Figure S2.** Forest plot for the risk of the outcome: healthy survival (survival without neurodevelopmental delay and without respiratory problems) in children who have been randomized prenatally to amnioinfusion or no intervention.

Legend: CI, confidence interval; M-H, Mantel-Haenszel; df, degrees of freedom.
